# Supplementary material for: Genetic association of preeclampsia to von Willebrand factor and its size-regulator ADAMTS13
Source: Research Square preprint supplement (doi:10.21203/rs.3.rs-5685318/v1), 2025-07-08
Supplement: Supplementary file 1 [file 1b897d01df8b1bacfdaf3a3d.docx]

**Supplementary data to**

Genetic association of preeclampsia to von Willebrand factor and its size-regulator ADAMTS13

A. Inkeri Lokki 1, 2, §, Michael Triebwasser 3, Emma Daly 4, Mitja I. Kurki 5 ,6, 7, 8, 9, Markus Perola 5, 9, 10, Kirsi Auro 10,11, Anuja Java 12, Jane E. Salmon 13, Seppo Heinonen 14, Eero Kajantie 15, 16, 17, Juha Kere 18, 19, 20, 21, Riitta Lassila 22, Mark Daly 5, 8, John P. Atkinson 23, Hannele Laivuori 5, 24, 25, 26†, Seppo Meri 1, 28, 27 †§

†shared contribution

**Author affiliations:**

1 Bacteriology and Immunology, University of Helsinki and Helsinki University Hospital, Helsinki, Finland

2 Heart and Lung Center, Helsinki University Hospital, Helsinki, Finland

3 Division of Pediatric Hematology and Oncology, Department of Pediatrics, University of Michigan, Ann Arbor, Michigan, USA

4 Hospital and Harvard Medical School, Boston, Massachusetts, USA

5 Institute for Molecular Medicine Finland, University of Helsinki, Helsinki, Finland

6 Program in Medical and Population Genetics, Broad Institute of Harvard and MIT, Cambridge, MA, USA.

7 Stanley Center for Psychiatric Research, Broad Institute of Harvard and MIT, Cambridge, MA, USA.

8 Analytic and Translational Genetics Unit, Massachusetts General Hospital, Boston, MA, USA.

9 Helsinki Institute of Life Science (HiLIFE), University of Helsinki, Helsinki, Finland

10 Department of Health, National Institute for Health and Welfare, Helsinki, Finland

11 Research Program for Clinical and Molecular Metabolism, Faculty of Medicine, University of Helsinki, Helsinki, Finland

12 Division of Nephrology, Department of Medicine, Washington University School of Medicine, St. Louis, Missouri, USA

13 Hospital for Special Surgery, Weill Medical College of Cornell University, New York, New York, USA

14 Obstetrics and Gynaecology, University of Helsinki and Helsinki University Hospital, Helsinki, Finland

15 Department of Clinical and Molecular Medicine, Norwegian University of Health and Technology, Trondheim, Norway.

16 PEDEGO Research Unit (Research Unit for Pediatrics, Dermatology, Clinical Genetics, Obstetrics and Gynecology), Medical Research Center Oulu, Oulu University Hospital and University of Oulu, Oulu, Finland

17 Population Health Unit, Finnish Institute for Health and Welfare, Helsinki and Oulu, Finland.

18 Clinical Medicine Research Unit, MRC Oulu, Oulu University Hospital and University of Oulu, Oulu, Finland.

19 Department of Biosciences and Nutrition, Karolinska Institutet, Stockholm, Sweden

20 Folkhälsan Research Center, Helsinki, Finland

21 Stem Cells and Metabolism Research Program, University of Helsinki, Helsinki, Finland

22 Unit of Coagulation disorders, Department of Hematology, Helsinki University Hospital, Helsinki, FI-00029 Finland

23 Division of Rheumatology, Department of Medicine, Washington University School of Medicine, St. Louis, Missouri, USA

24 Centre for Child, Adolescent, and Maternal Health Research, Faculty of Medicine and Health Technology, Tampere University, Tampere, Finland

25 Department of Obstetrics and Gynecology, Tampere University Hospital, Tampere, Finland

26 Medical and Clinical Genetics, University of Helsinki and Helsinki University Hospital, Helsinki, Finland

28 Translational Immunology Program, Research Programs Unit, University of Helsinki, Helsinki, Finland

27 HUSLAB Diagnostic Center, Helsinki University Hospital, Helsinki, Finland

**Supplementary methods**

Patient selection

First, we studied 500 non-obese [body mass index (BMI)<30 kg/m2] women with PE pregnancies and 190 non-PE-pregnancy controls. The two groups were matched geographically by age and BMI from The Finnish Genetics of preeclampsia Consortium **(**FINNPEC) cohort, which is a case-control cohort recruited from the five Finnish University Hospitals[1]. Nulliparous or multiparous women with a singleton pregnancy and adequate proficiency in the Finnish language were eligible for the study. PE was defined as hypertension and proteinuria occurring during the second half of the pregnancy. Hypertension was defined as systolic blood pressure ≥140 mmHg or diastolic blood pressure ≥90 mmHg after 20 weeks of gestation. Proteinuria was defined as the urinary excretion of ≥0.3 g protein in a 24-hr specimen, or 0.3 g/l, or two ≥1+ readings on dipstick in a random urine determination with no evidence of a urinary tract infection. The diagnoses were independently verified by a research nurse and a physician-researcher. Seven PE women and one control woman were excluded due to genotyping failure.

Second, we included in the analyses the whole exome sequencing from an additional 122 women with a history of PE and 1905 parous women with no such history from the national FINRISK study cohort. For identifying PE and eclampsia cases in the FINRISK study cohort, the following Finnish ICD codes were searched in the comprehensive National Hospital Discharge Register covering years 1992 to 2007: **ICD-10** (in use since 1996)**:** O14.0, O14.1, O14.9, O15.0, O15.1, O15.2, O15.9, **ICD-9** (in use 1987-1996)**:** 6424-6426, 6427A and **ICD-8** (in use 1968-1986) **:**637.03, 637.04, 637.09, 637.10, 637.99. Controls were all the women from FINRISK, who had given birth at least once and did not have any of these diagnoses recorded. The study cohorts have been described in detail elsewhere [2-5].

Laboratory methods (FINNPEC)

Genomic DNA was extracted from 10 ml of EDTA whole blood using the NucleoSpin Blood XL DNA extraction kit (Macherey-Nagel GmbH & Co.) or Chemagic Magnetic Separation Module I –machine (Chemagen) and subsequently stored at -20°C.

Sequence capture by hybridisation was performed according to the manufacturer’s recommendations with in-house modifications (Roche SeqCap Hybridization and Wash Kit No. 05634261001). We utilised longer blocking oligos containing an additional 7bp inosine segment for promiscuous pairing with different index sequences. Following hybridisation, captured DNA was washed and eluted according to the manufacturer’s instructions.

Sequencing was performed on an Illumina HiSeq 2000 at the Washington University Genome Technology Access Center using 2x101 bp, 2x135 bp and 2x150 bp reads. We aligned sequencing to GRCh37 using bwa aln (v0.6.1-r104) and genotyped the samples using the Genome Analysis ToolKit (v2.5.2-gf57256b) Unified [6–8].

The whole exome sequencing data were also available from the FINRISK cohort consisting of 122 women with a history of PE and 1905 parous women without PE pregnancies from the national FINRISK study (THL Biobank licence # 8/2016). We selected 58 genes coding for the hemostasis and coagulation proteins as targets from the exome sequencing. For analysis, genotype data from the two cohorts were combined. Quality control steps were undertaken to remove variants with Hardy-Weinberg Disequilibrium in controls (p-value < 0.001) and monomorphic variants.

**Supplementary Table S1.** Clinical characteristics of the patients and controls participating in the targeted exomic study (FINNPEC).

In the FINNPEC cohort, haemolysis, elevated liver enzymes and low platelet count (HELLP) syndrome was diagnosed when at least two of the following criteria were met: lactate dehydrogenase ≥235 U/L, alanine aminotransferase ≥70 U/L, aspartate aminotransferase ≥70 U/L, thrombocytes ≤100 E9/L[1]. Following these criteria, 37 of the PE patients in the FINNPEC cohort had HELLP syndrome.

|  | PE women (n=487)† | Controls (n=187) | P-value‡ |
| --- | --- | --- | --- |
| Age, years; median (25, 75 percentiles) | 29 (26, 32) | 29 (26, 32) | 0.993 |
| Body mass index before pregnancy; median (25, 27 percentiles) | 22.6 (20.9, 24.8) | 22.5 (20.6, 25) | 0.450 |
| Proteinuria, g/l; median (25, 75 percentiles) | 3.31 (1.59, 6.04) | na | na |
| Blood pressure: maximum systolic, mmHg; median (25, 75 percentiles) | 164 (152, 177) | 125 (118, 133) | <0.001 |
| Blood pressure: maximum diastolic, mmHg; median (25, 75 percentiles) | 108 (103, 114) | 82 (78, 88) | <0.001 |
| Gestation weeks; median (25, 75 percentiles) | 38 (35, 39) | 40 (39, 41) | <0.001 |
| Mode of birth (vaginal deliveries n; %) | 279; 57.3 | 160; 85.6 | <0.001 |
| Baby sex (% female) | 52.9 | 49.7 | 0.450 |
| Baby weight; g median (25, 75 percentiles) | 2820 (2210, 3270) | 3540 (3260, 3850) | 0.119 |
| Baby weight; 5% percentile cut-off value; g, n | 1132, 24 | 2905.4, 9 |  |
| Placenta weight, g; median (25, 75 percentiles) | 500 (405, 600) n=464 | 590 (500, 670) n=181 | 0.139 |
| Pre-pregnancy smoking % | 21.2, n=467 | 19.7, n=177 | 0.582 |
| First gravidity (n; %) | 328; 67.4 | 144; 77 | 0.030 |
| Primipara (n; %) | 450; 92.4 | 187; 100 | 0.005 |

* 97.4% of 500 women with PE and 98.4% of 190 control women passed quality control and their data is reported here and in the association analyses.

†15.6 % of the preeclamptics gave birth <34 gw and 72.7% had severe preeclampsia

‡ Chi2

BMI = mass (kg) / height2 (m); na, not available (no proteinuria in controls).

**References**

1. Jääskeläinen, T. *et al.* Impact of obesity on angiogenic and inflammatory markers in the Finnish Genetics of Pre-eclampsia Consortium (FINNPEC) cohort. *Int J Obes (Lond)* **43**, 1070–1081 (2019).

2. Inkeri Lokki, A. *et al.* Protective Low-Frequency Variants for Preeclampsia in the Fms Related Tyrosine Kinase 1 Gene in the Finnish Population. *Hypertension* **70**, 365–371 (2017).

3. Lokki, A. I. *et al.* Identification of complement factor H variants that predispose to pre-eclampsia: A genetic and functional study. *BJOG* **11**, 14 (2023).

4. Lokki, A. I. *et al.* Understanding rare genetic variants within the terminal pathway of complement system in preeclampsia. *Genes & Immunity 2024* **10**, 1–5 (2024).

5. Lokki, A. I. *et al.* Dysfunction of complement receptors CR3 (CD11b/18) and CR4 (CD11c/18) in preeclampsia: a genetic and functional study. *BJOG* (2021)

6. Li, H. & Durbin, R. Fast and accurate short read alignment with Burrows-Wheeler transform. *Bioinformatics* **25**, 1754–1760 (2009).

7. McKenna, A. *et al.* The Genome Analysis Toolkit: a MapReduce framework for analyzing next-generation DNA sequencing data. *Genome Res* **20**, 1297–1303 (2010).

8. DePristo, M. A. *et al.* A framework for variation discovery and genotyping using next-generation DNA sequencing data. *Nat Genet* **43**, 491–498 (2011).
